# Supplementary material for: A nanostructured nickel/carbon matrix as an efficient oxygen evolution reaction electrocatalyst for rechargeable zinc–air batteries
Source: Royal Society of Chemistry journal article supplement (doi:10.1039/c9qi00402e), 2019-01-01
Supplement: c9qi00402e1.pdf [file c9qi00402e1.pdf]

*Electronic Supplementary Information (ESI) for*

**Nanostructured nickel/carbon matrix as efficient oxygen evolution reaction  
electrocatalyst for rechargeable zinc-air batteries**

Chengqiang Cui,<sup>a,1</sup> Xiaoming Ge,<sup>b,1</sup> Tao An,<sup>b</sup> Bing Li,<sup>b</sup> Delvin Wu,<sup>b</sup> Nguk Neng Tham,<sup>b</sup> Kai  
Zhang,<sup>a</sup> Yunbo He,<sup>\*a</sup> and Zhaolin Liu<sup>\*b</sup>

<sup>a</sup> School of Electromechanical Engineering, Guangdong University of Technology, No. 100  
Waihuan Xi Road, Guangzhou 510006, China. Email: [heyunbo@gdut.edu.cn](mailto:heyunbo@gdut.edu.cn)

<sup>b</sup> Institute of Materials Research and Engineering (IMRE), A\*STAR (Agency for Science,  
Technology and Research), 2 Fusionopolis Way, Innovis, #08-03, Singapore 138634, Republic  
of Singapore. Email: [zl-liu@imre.a-star.edu.sg](mailto:zl-liu@imre.a-star.edu.sg)

1: These authors contributed equally.

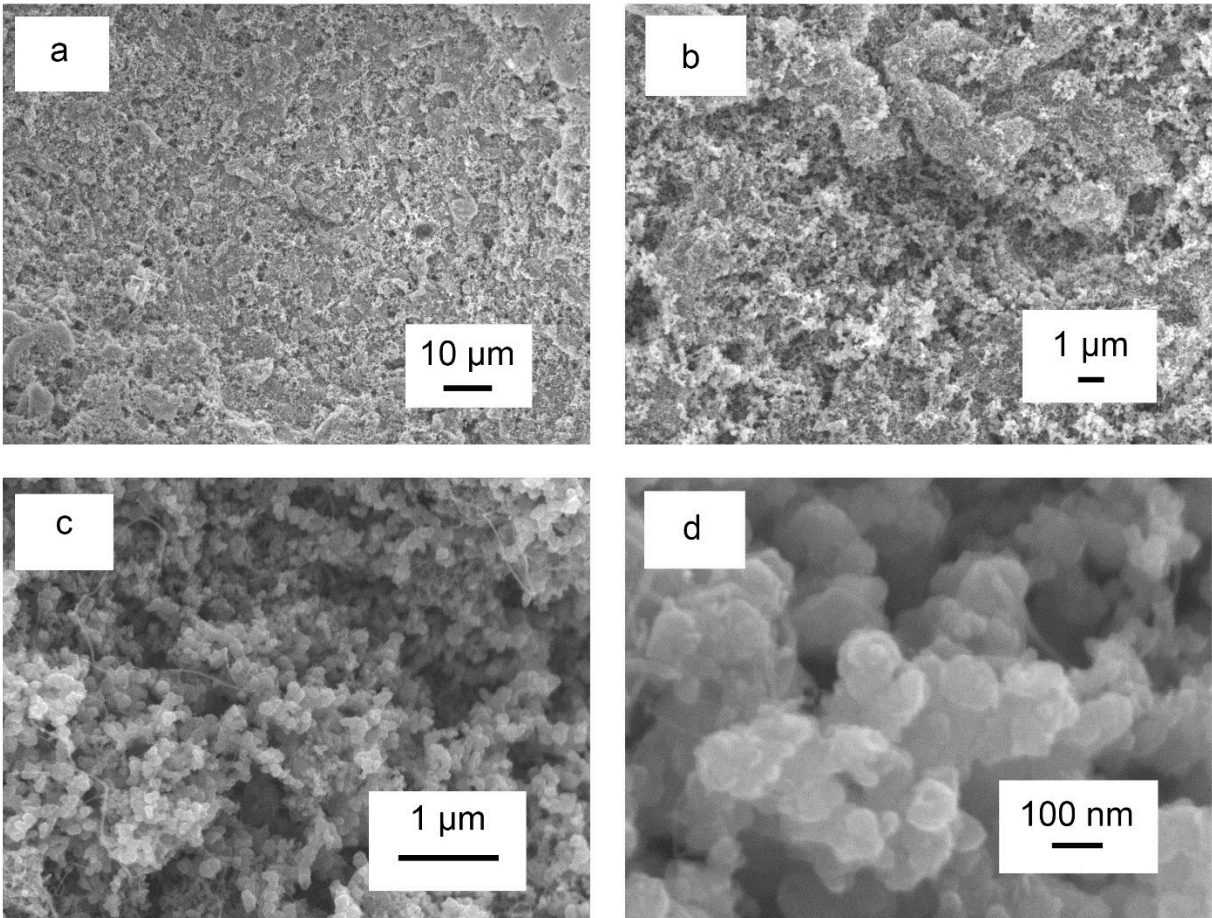

**Figure S1.** Scanning electron microscopy (SEM) surface morphology images of 10 BN GDL carbon paper at different magnifications.

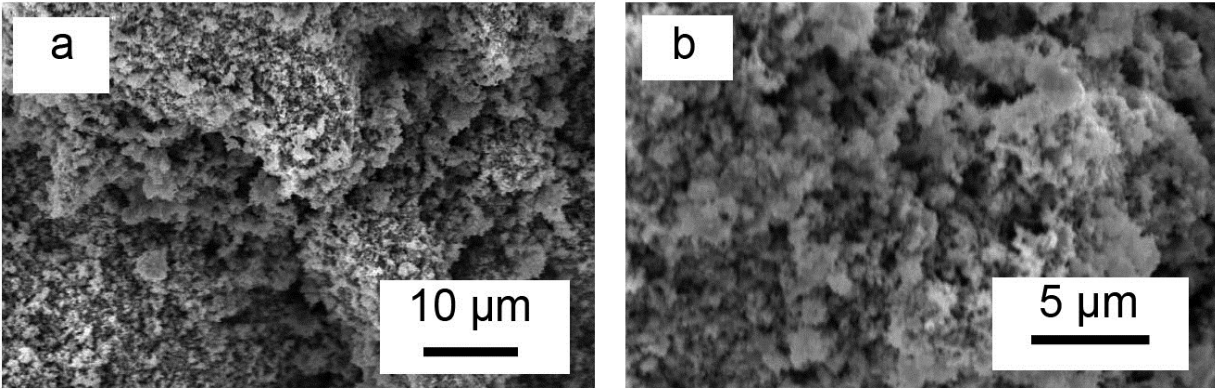

**Figure S2.** SEM surface morphology images of Ni/2MI precursor grown on 10 BN GDL carbon paper at the magnification of  $\times 2000$  (a) and  $\times 5000$  (b).

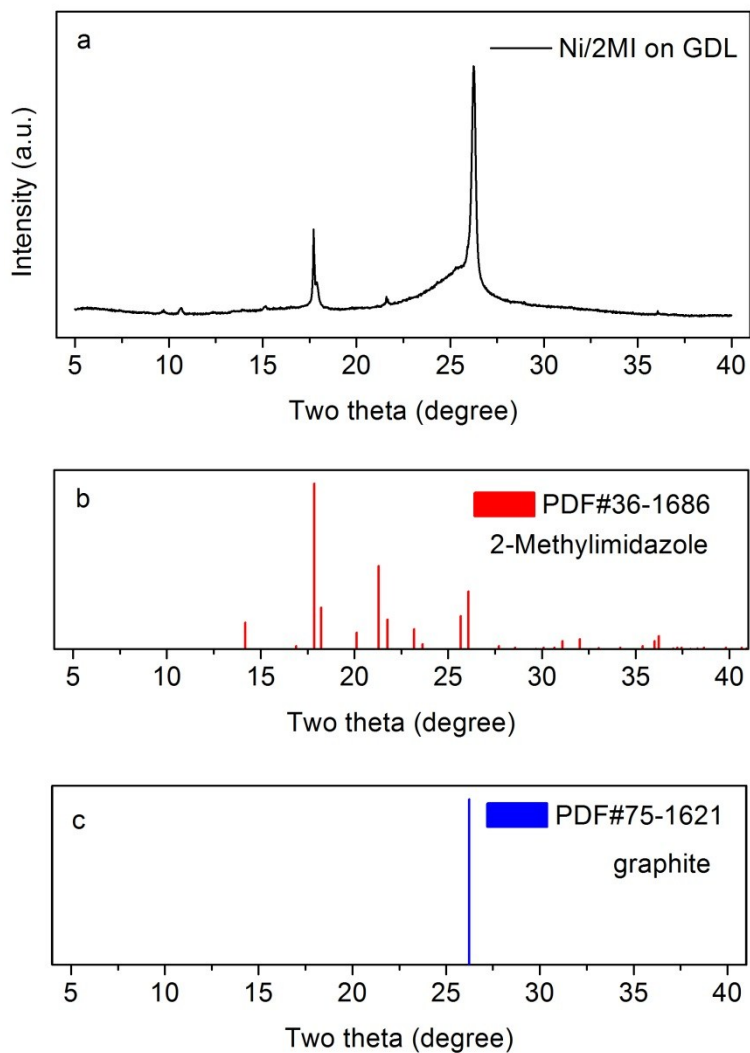

**Figure S3.** (a) X-ray diffraction (XRD) pattern of Ni/2-methylimidazolate (Ni/2MI) grown on 10 BN GDL carbon paper. (b) Powder diffraction file (PDF) No. 36-1686 which is 2-methylimidazole. (c) PDF No. 75-1621 which is graphite. Note that no Ni species is observed in (a) because of the detection limit of XRD.

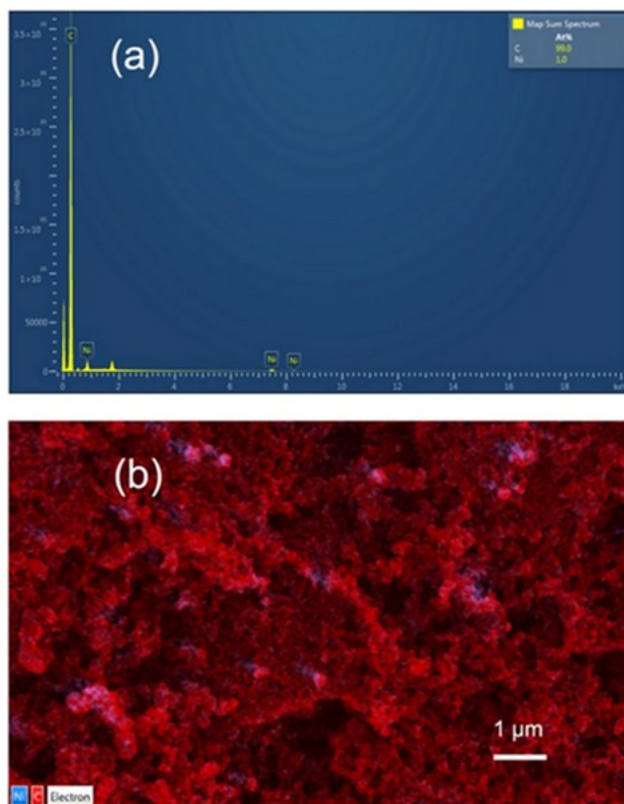

**Figure S4.** (a) EDX spectrum and (b) EDX mapping of a Ni/C oxygen evolution electrode.

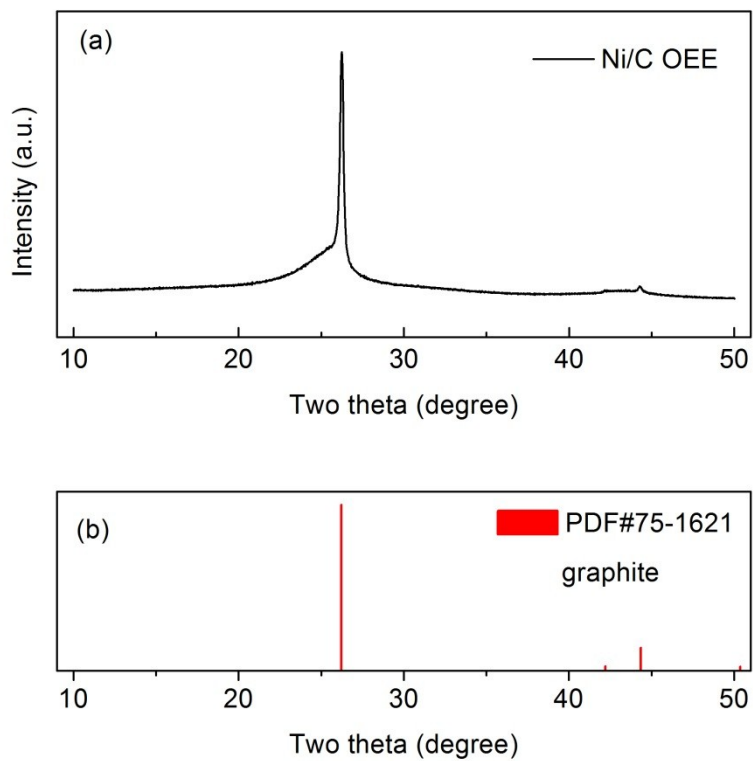

**Figure S5.** (a) XRD pattern of Ni/C oxygen evolution electrode (OEE). (b) PDF No. 75-1621 which is graphite. Note that no Ni species is observed because of the detection limit of XRD.

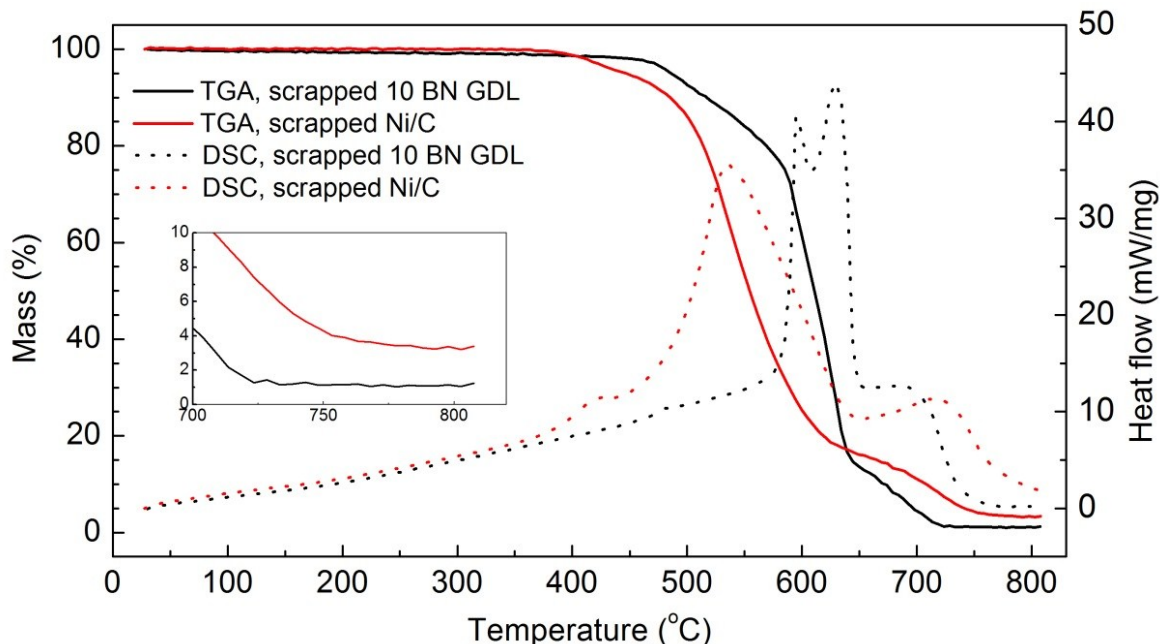

**Figure S6.** TGA/DSC profiles of Ni/C powders and carbon powders scrapped from the surface of Ni/C OEE and blank GDL carbon paper, respectively. TGA/DSC profiles show that the Ni/C OEE has 3.37 wt.% of solid ashes, comprising 2.22 wt.% of NiO and 1.15 wt.% of intrinsic ashes of blank GDL. The 2.22 wt.% NiO is equivalent to 0.36 at.% of Ni species in the scrapped Ni/C powders (*cf.* 1 at.% Ni given by EDX, Figure 1a). It is conceivable for a lower Ni loading recorded by TGA/DSC than that by EDX, because carbon black powders on GDL carbon paper were scrapped off together with Ni/C catalysts during the sample collection.

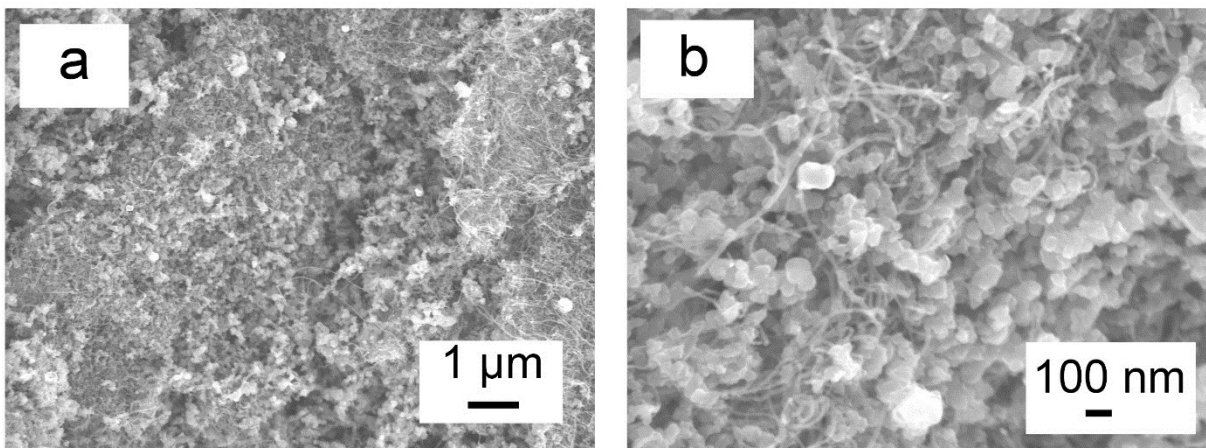

**Figure S7.** SEM surface morphology images of Ni/C OEE under magnification of  $\times 10,000$  (a) and  $\times 50,000$  (b).



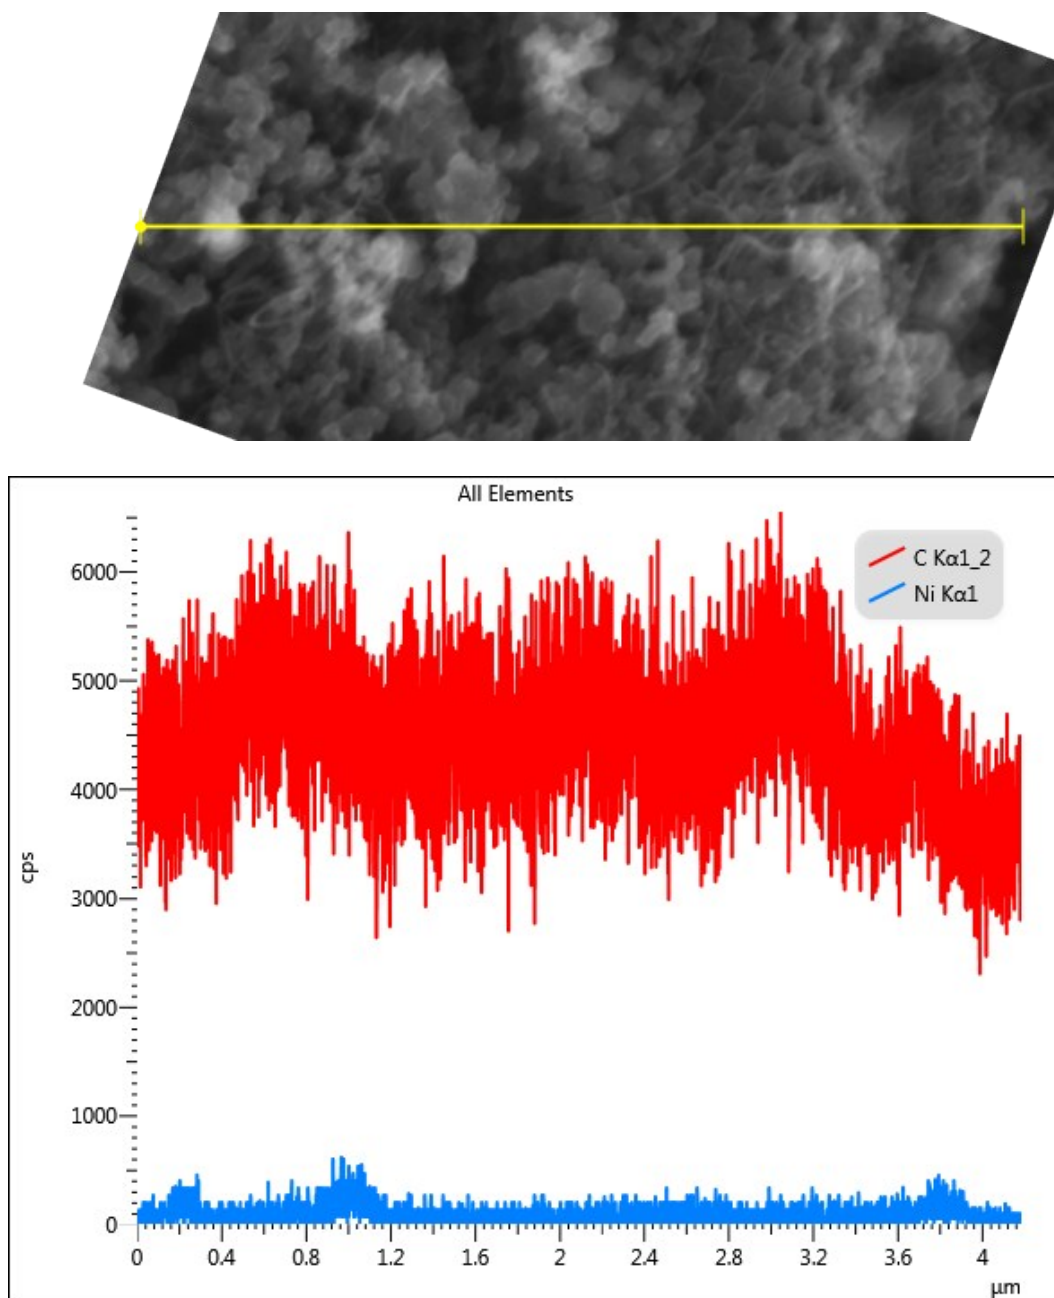

**Figure S8.** EDX line-profiling across the surface of Ni/C OEE. The spectrum (bottom) corresponds to the yellow line in the SEM image (top). The result indicates some Ni-rich regions around 0.2 μm, 0.9 μm and 3.8 μm in size.

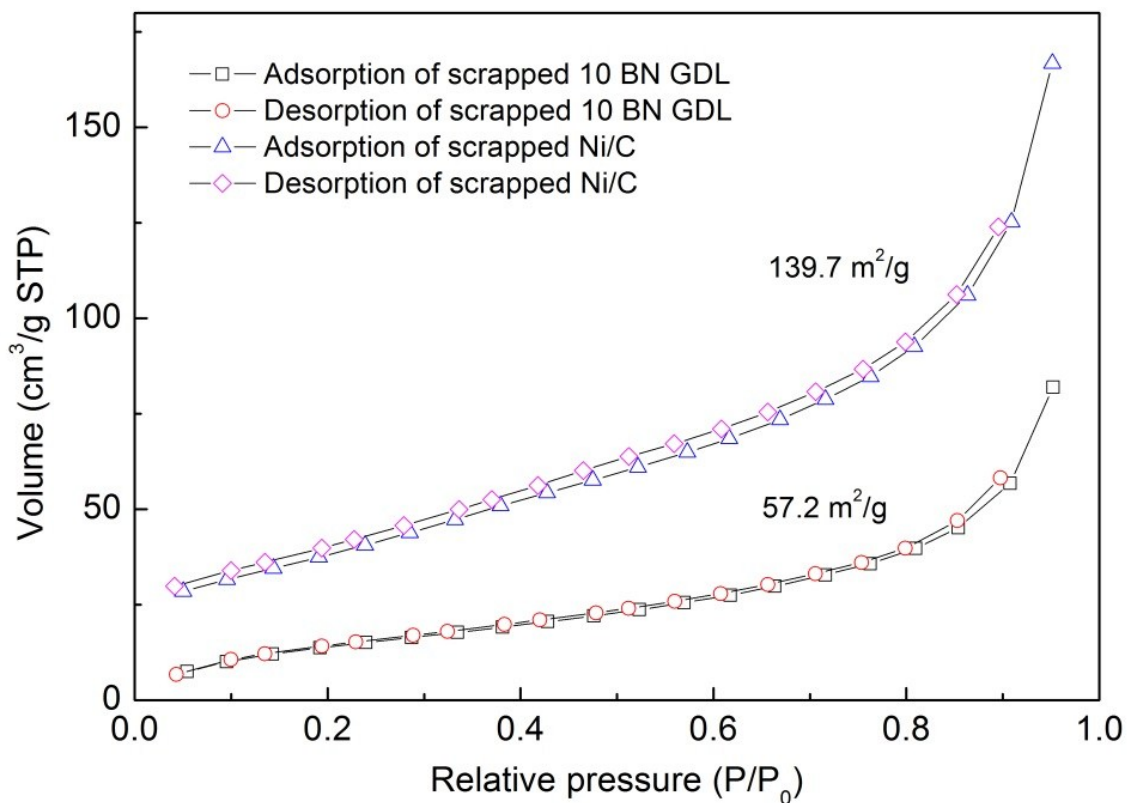

**Figure S9.** Nitrogen adsorption/desorption isotherms of powders scrapped from 10 BN GDL carbon paper and Ni/C OEE. The result shows 214% improvement of the BET surface area of 10 BN GDL carbon paper after the growth of Ni/C on its surfaces, demonstrating the porous nature of the Ni/2MI complex-derived carbon support.

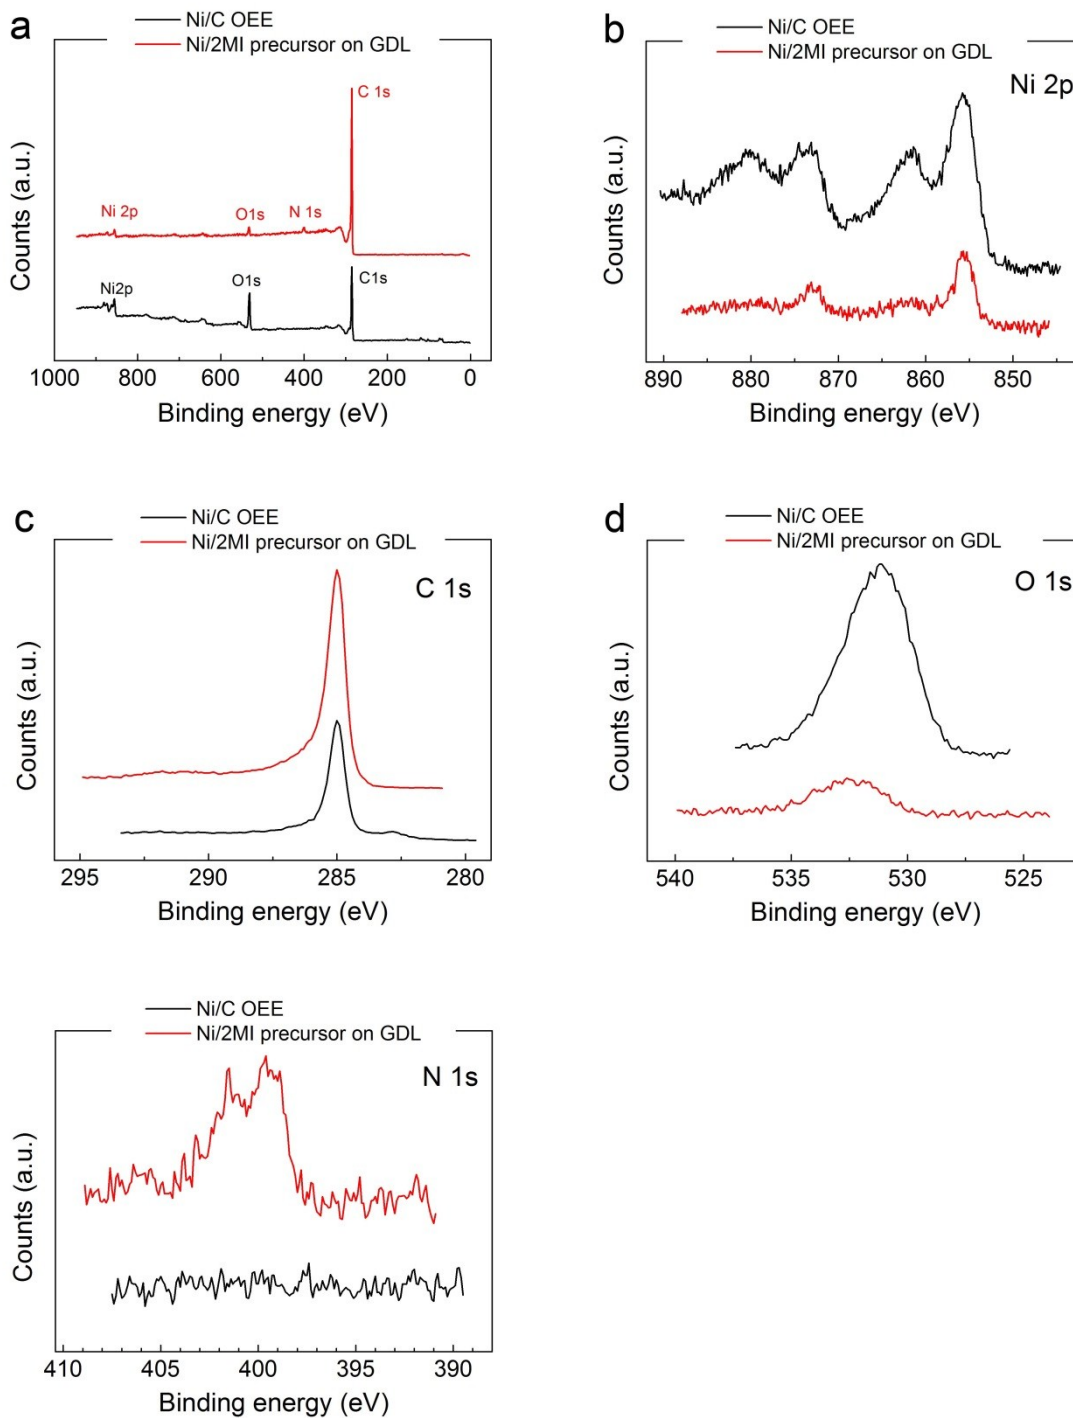

**Figure S10.** XPS spectra of Ni/2MI on GDL carbon paper and Ni/C oxygen evolution electrode:

(a) survey scans, (b) Ni 2p, (c) C 1s, (d) O 1s and (e) N 1s.

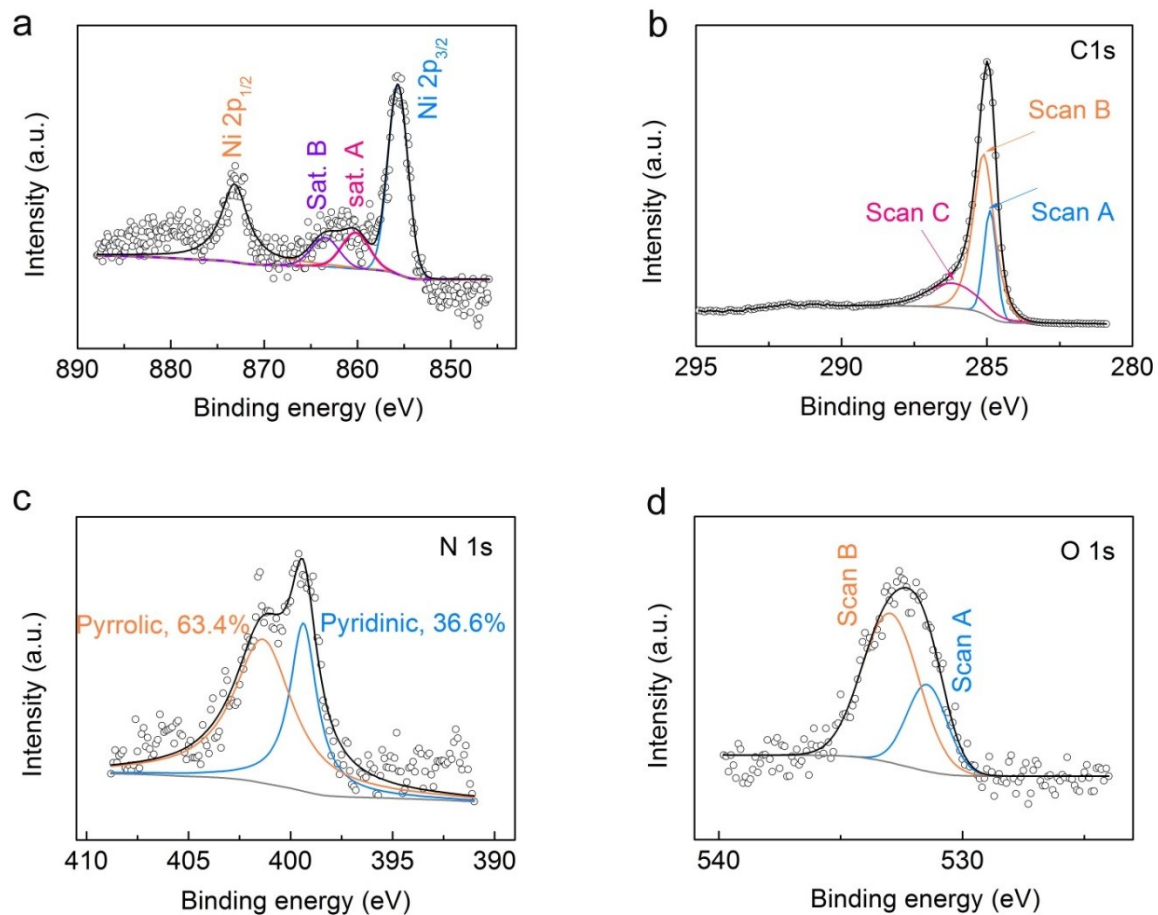

**Figure S11.** Fitted high-resolution XPS spectra of Ni/2MI on GDL carbon paper: (a) Ni 2p, (b) C 1s, (c) N 1s and (d) O 1s.

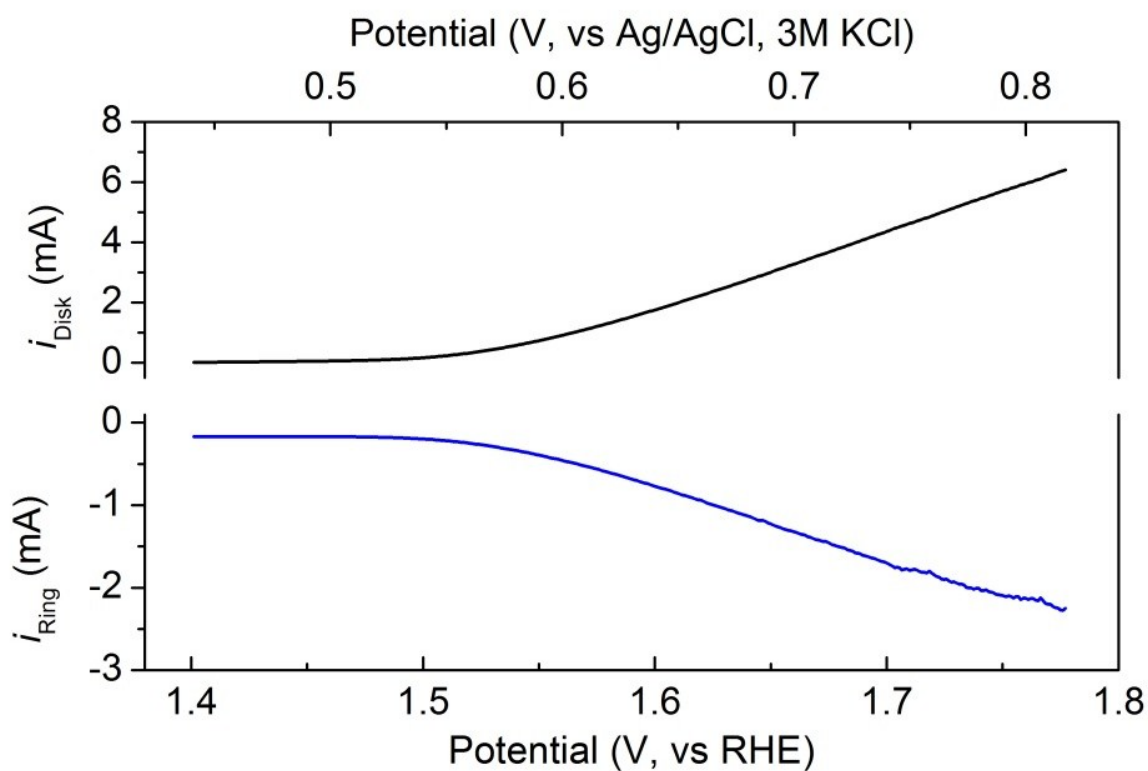

**Figure S12.** Disk ( $4\text{OH}^- \rightarrow 2\text{H}_2\text{O} + \text{O}_2 + 4\text{e}^-$ ) and ring ( $2\text{H}_2\text{O} + \text{O}_2 + 4\text{e}^- \rightarrow 4\text{OH}^-$ ) currents of RRDE loaded with  $0.1 \text{ mg cm}^{-2}$  scrapped Ni/C. The electrolyte is  $\text{N}_2$ -saturated  $0.1 \text{ M KOH}$ . The rotating rate of RRDE is  $1600 \text{ rpm}$ . The sweeping rate is  $10 \text{ mV s}^{-1}$ . The collection efficiency of RRDE obtained from  $E_{\text{ring}} = 1.60 \text{ V}$  to  $1.75 \text{ V}$  is  $(39.2 \pm 1.8) \%$ , close to manufacturer's data of  $37\%$  ([www.pineinst.com](http://www.pineinst.com)).

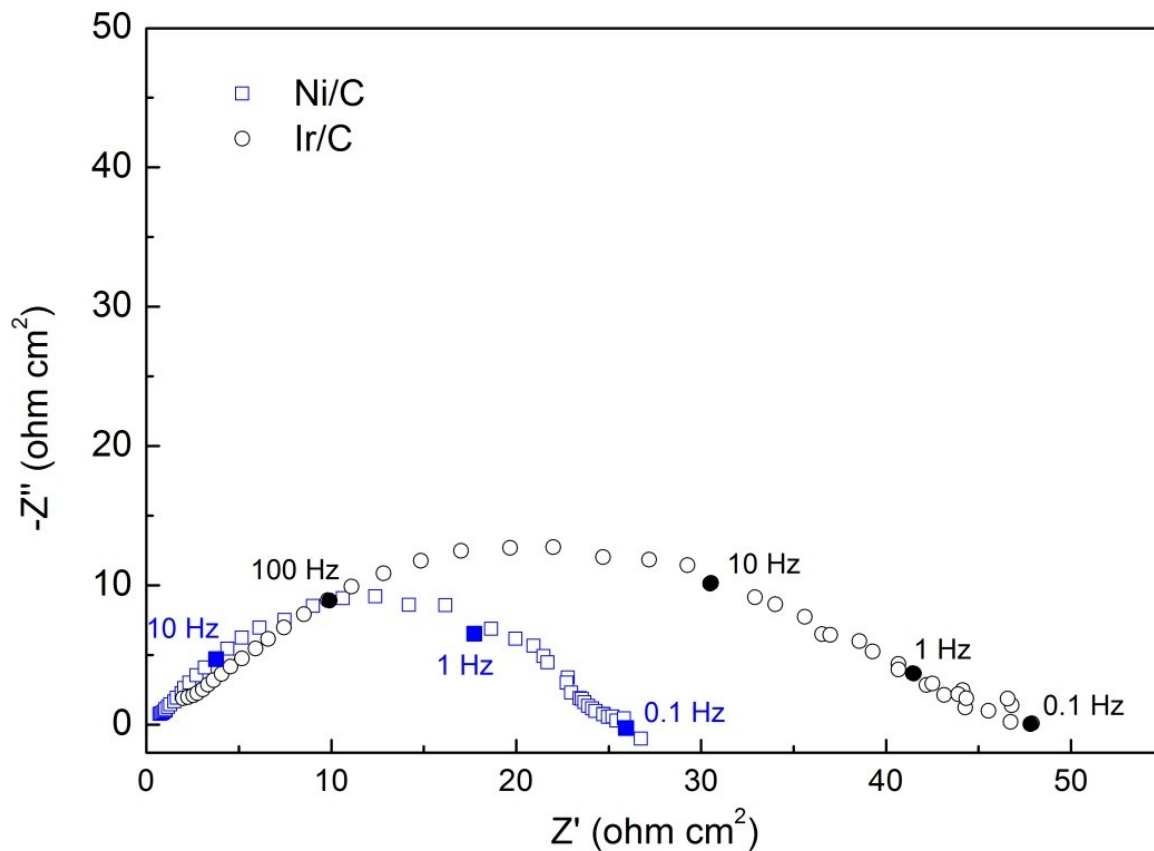

**Figure S13.** Impedance spectra of Ir/C and Ni/C RDE under a rotating rate of 400 rpm. The working electrode is polarized at 1.61 V. Ni/C catalysts are scrapped from a Ni/C OEE. The electrolyte is  $\text{O}_2$ -saturated 0.1 M KOH solution.

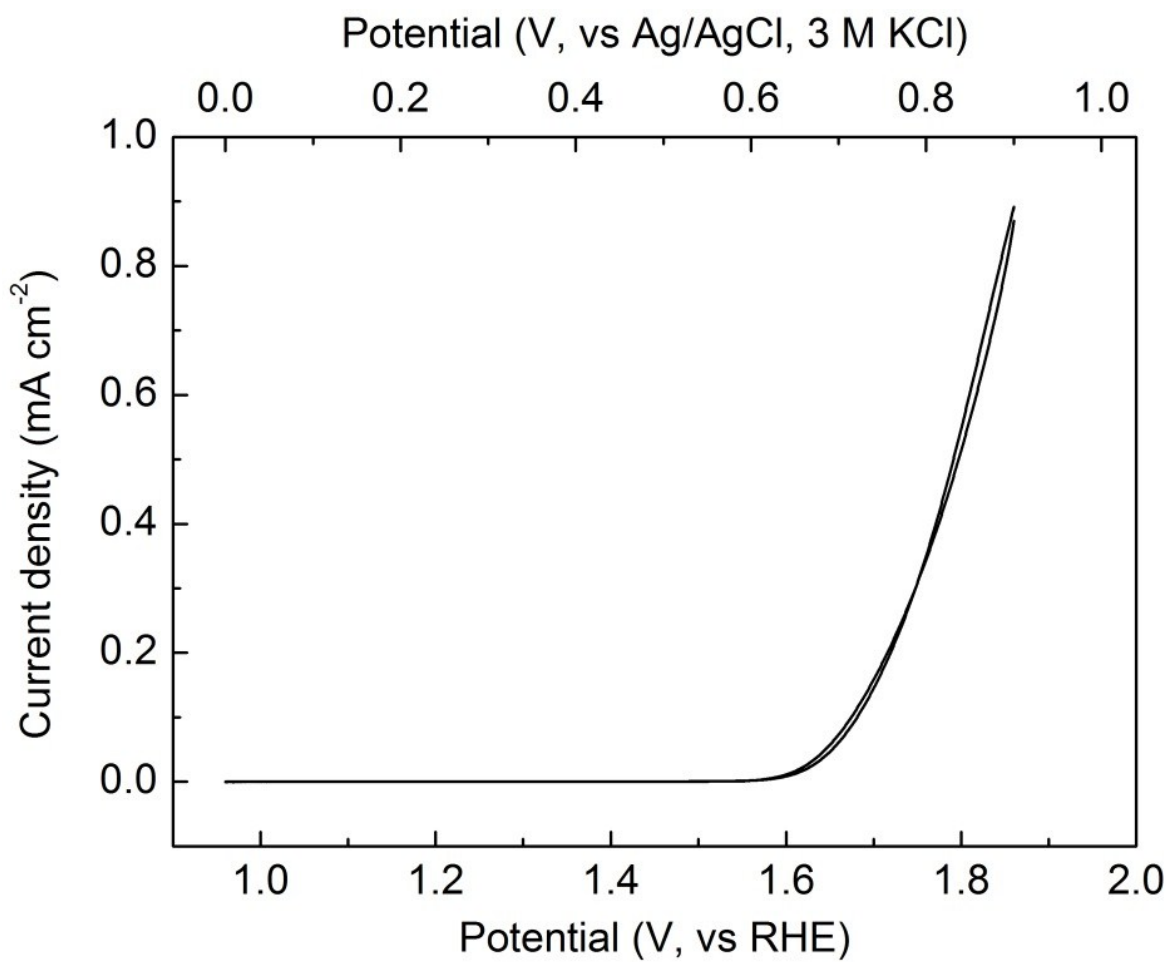

**Figure S14.** Cyclic voltammogram of blank GDL in O<sub>2</sub>-saturated 0.1 M KOH solution.

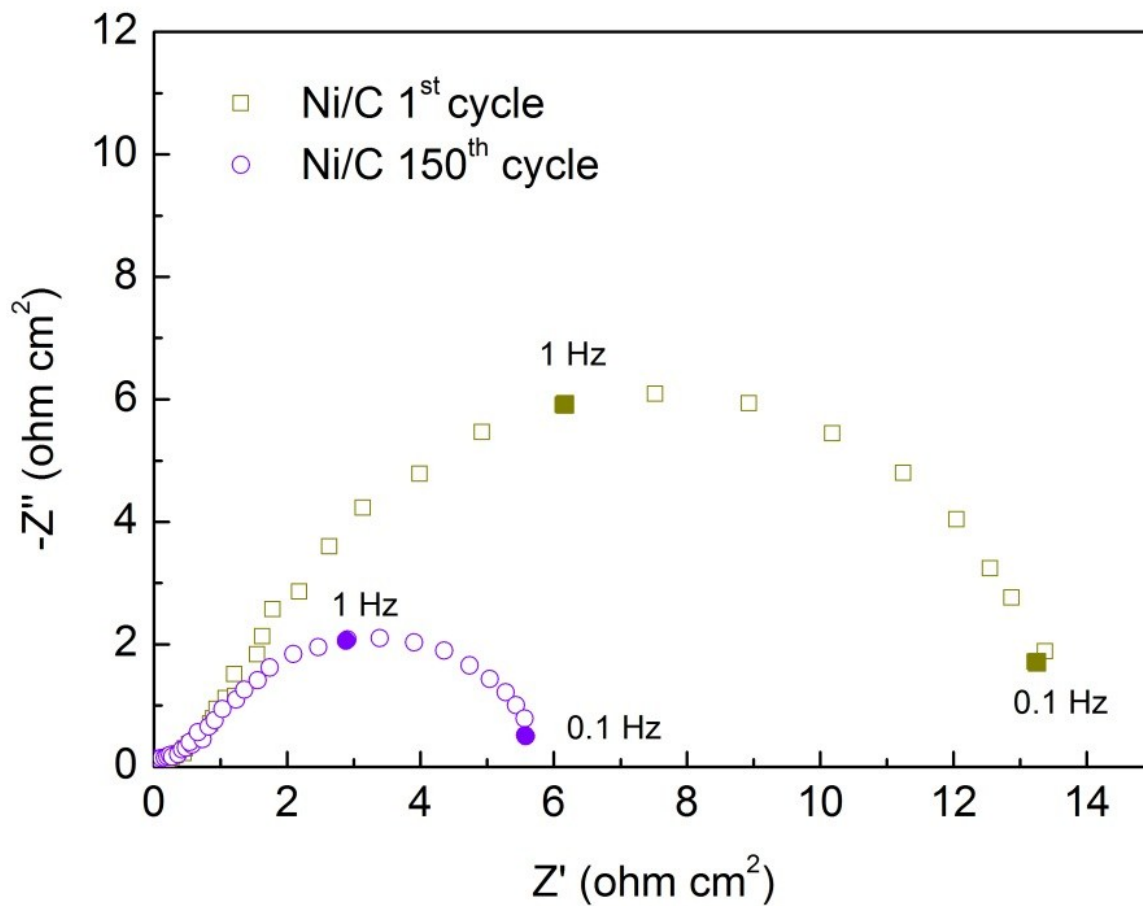

**Figure S15.** Impedance spectra of Ni/C OEE which is subjected to cyclic voltammetric degradation tests from 1.04 V to 1.88 V. The electrolyte is O<sub>2</sub>-saturated 0.1 M KOH solution.



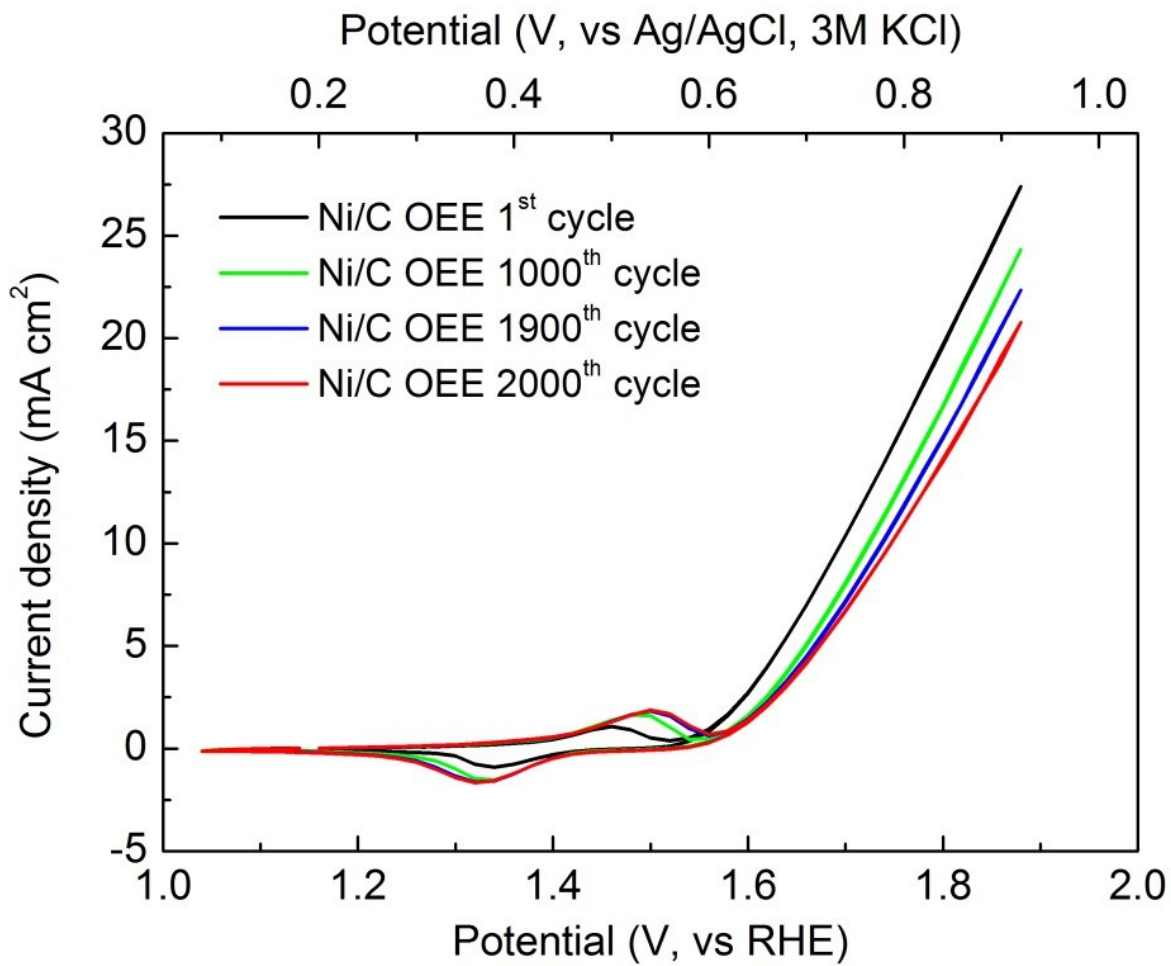

**Figure S16.** Cyclic voltammograms of Ni/C OEE in O<sub>2</sub>-saturated 0.1 M KOH solution.

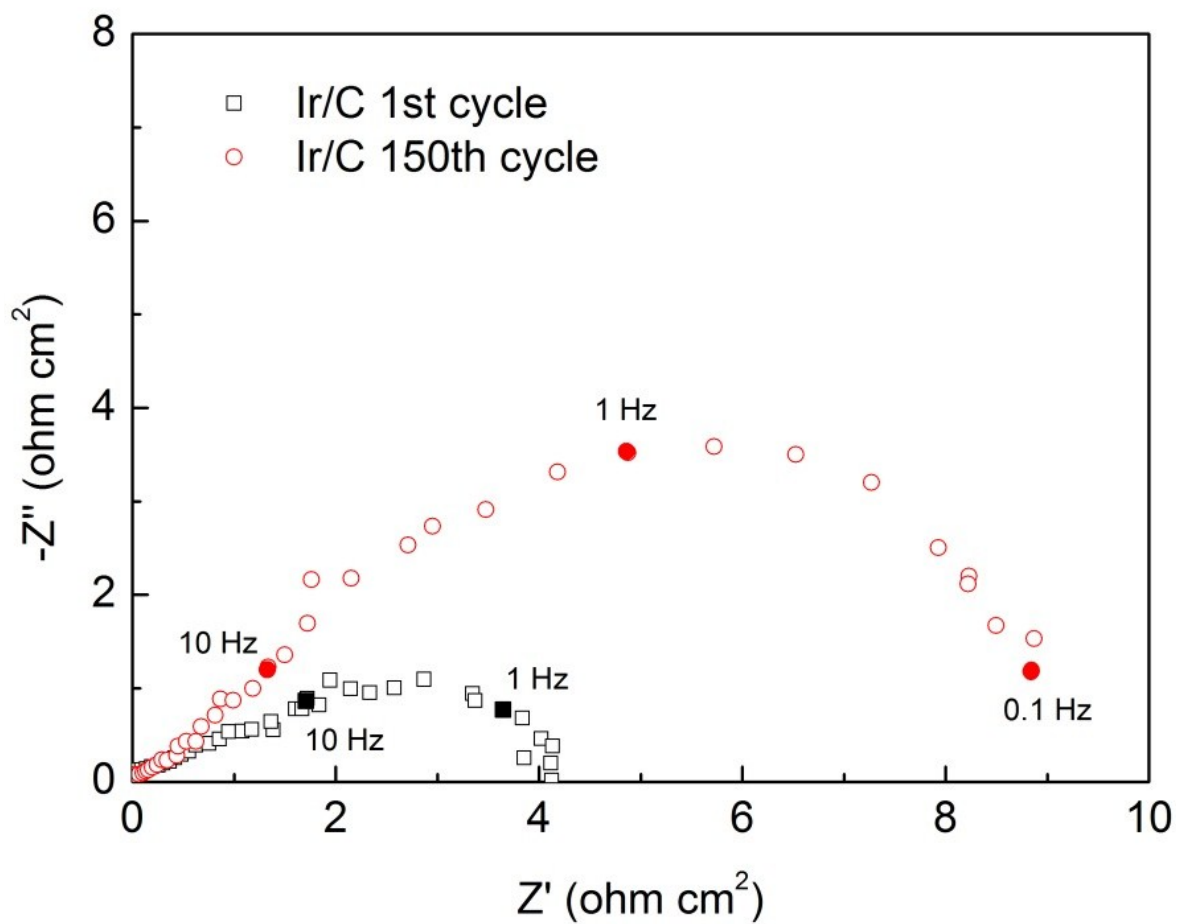

**Figure S17.** Impedance spectra of Ir/C OEE which is subjected to cyclic voltammetric degradation tests from 1.04 V to 1.88 V. The electrolyte is O<sub>2</sub>-saturated 0.1 M KOH solution.

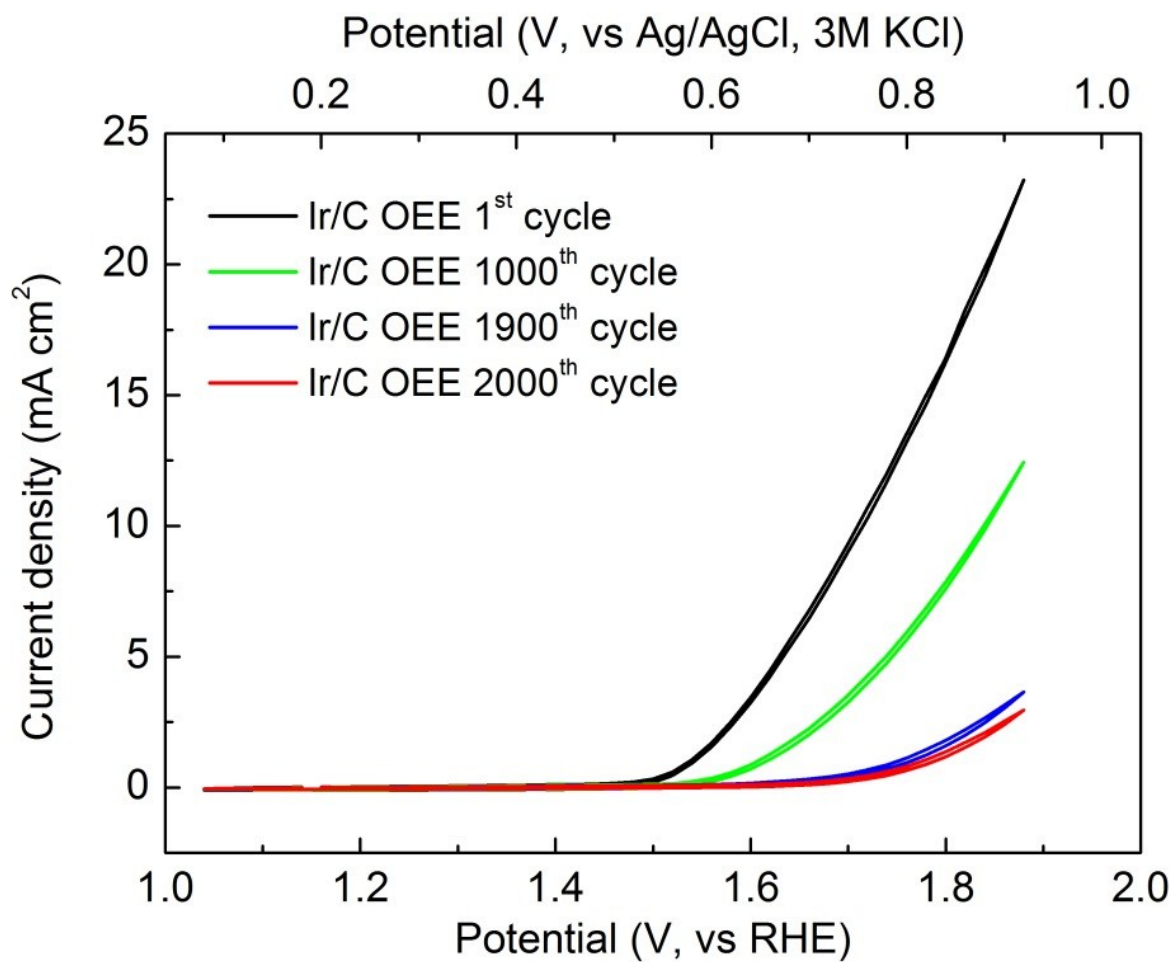

**Figure S18.** Cyclic voltammograms of Ir/C OEE in O<sub>2</sub>-saturated 0.1 M KOH solution.

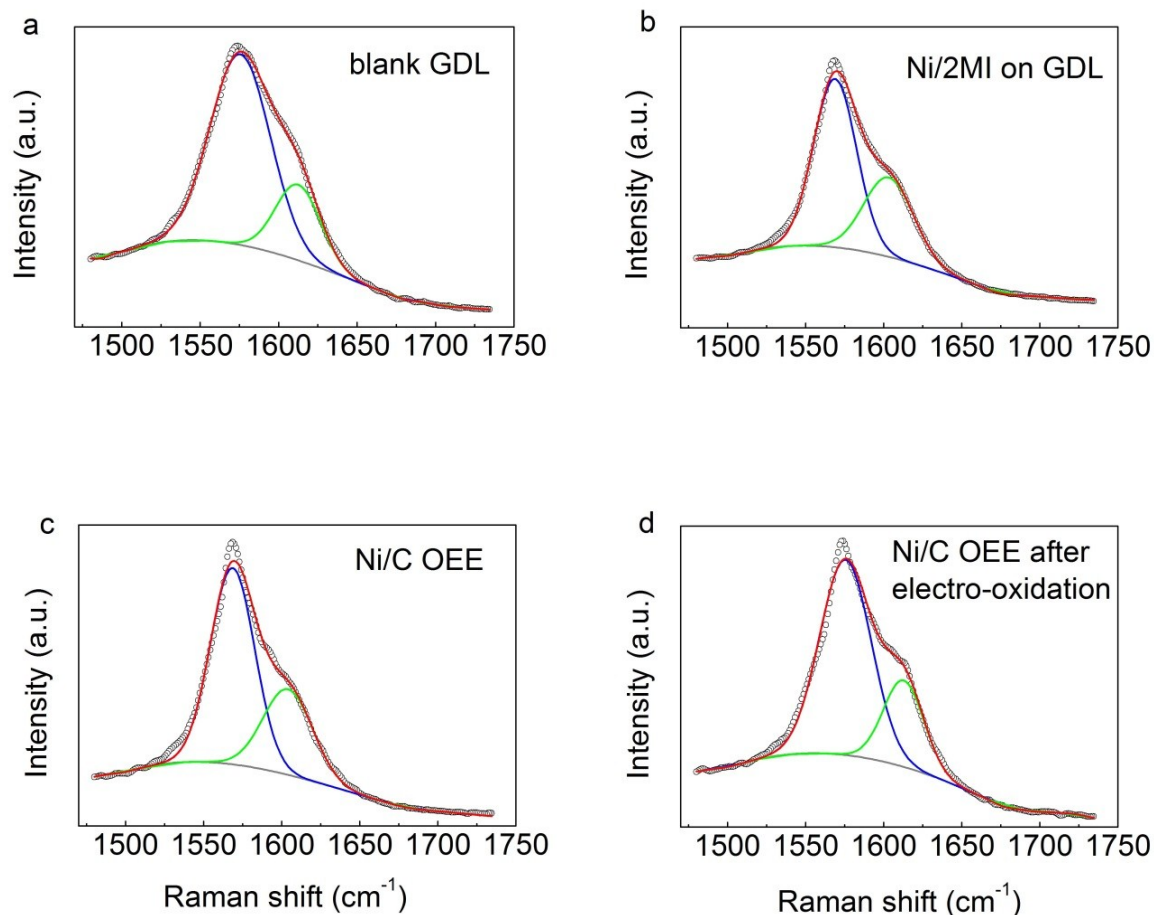

**Figure S19.** Fitted carbon G band Raman spectra of blank GDL carbon paper (a), Ni/2MI on GDL carbon paper (b), Ni/C OEE (c) and Ni/C OEE after electro-oxidation (d): experimental (black open dot), envelope (red line), main peak (blue line), shoulder peak (green line), and background (gray line). The fitting procedure is based on Gaussian peaks (Origin Pro 8 Peak Analyzer package). The electro-oxidation was conducted by 3 cyclic voltammetric scans from 0.96 V to 1.76 V with a sweeping rate of 0.5 mV s<sup>-1</sup>.

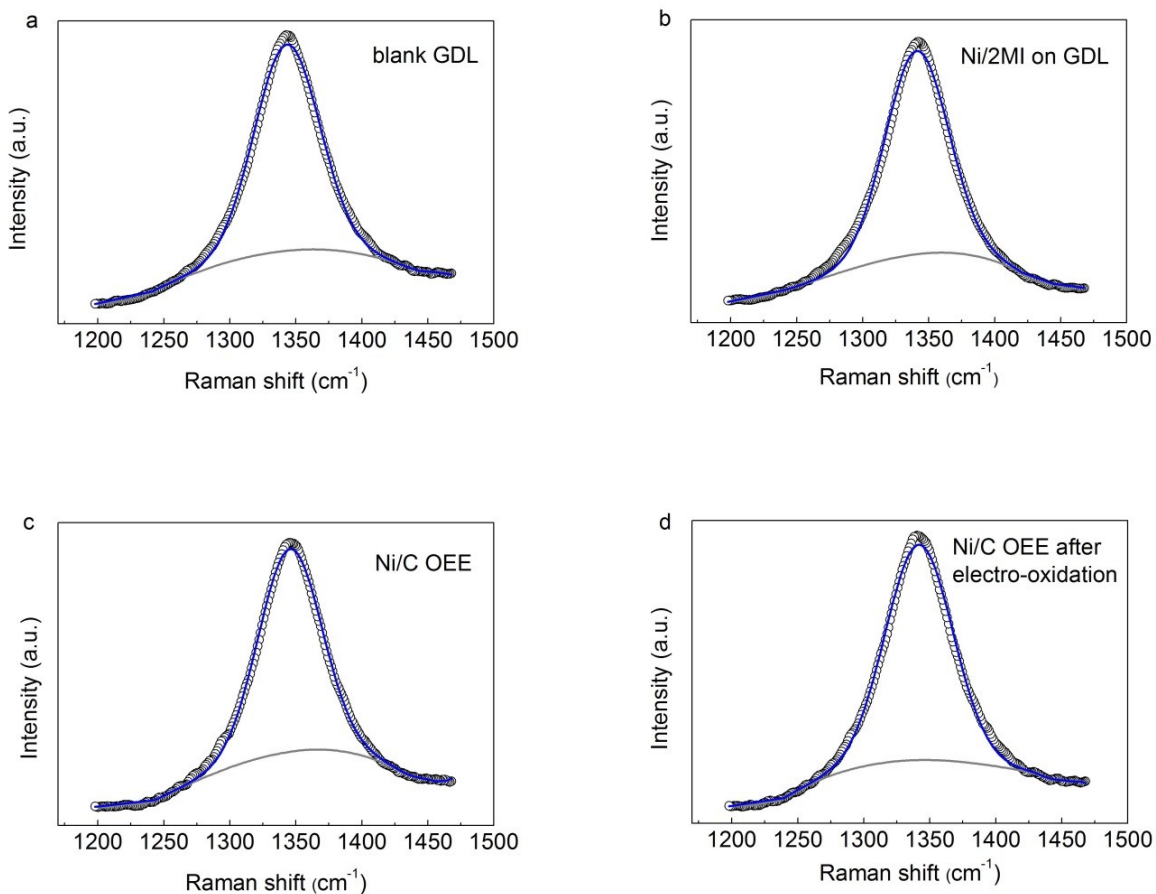

**Figure S20.** Fitted carbon D band Raman spectra of blank GDL carbon paper (a), Ni/2MI on GDL carbon paper (b), Ni/C OEE (c) and Ni/C OEE after electro-oxidation (d): experimental (black open dot), fitted peak (blue line), and background (gray line). The fitting procedure is based on Gaussian peaks (OriginPro 8 Peak Analyzer package). The electro-oxidation was conducted by 3 cyclic voltammetric scans from 0.96 V to 1.76 V with a sweeping rate of 0.5 mV s<sup>-1</sup>.

**Table S1.** Fitted carbon G band of Raman spectra of blank GDL carbon paper, Ni/2MI on GDL carbon paper, Ni/C OEE, and Ni/C OEE after electro-oxidation.

|                                            | G band                                        |                                                   |                                   | D band                                | D band/<br>G band<br>peak area<br>ratio | D band/<br>G band<br>main peak<br>height<br>ratio |
|--------------------------------------------|-----------------------------------------------|---------------------------------------------------|-----------------------------------|---------------------------------------|-----------------------------------------|---------------------------------------------------|
|                                            | Center of<br>main peak<br>(cm <sup>-1</sup> ) | Center of<br>shoulder<br>peak (cm <sup>-1</sup> ) | Should/main<br>peak area<br>ratio | Peak<br>center<br>(cm <sup>-1</sup> ) |                                         |                                                   |
| Blank<br>GDL                               | 1575.5                                        | 1612.5                                            | 0.30                              | 1343.4                                | 0.92                                    | 0.92                                              |
| Ni/2MI on<br>GDL                           | 1568.8                                        | 1603.2                                            | 0.54                              | 1341.1                                | 0.95                                    | 0.85                                              |
| Ni/C OEE                                   | 1568.5                                        | 1604.0                                            | 0.49                              | 1341.9                                | 0.88                                    | 0.73                                              |
| Ni/C OEE<br>after<br>electro-<br>oxidation | 1575.5                                        | 1612.7                                            | 0.35                              | 1345.7                                | 0.82                                    | 0.76                                              |
